# Supplementary material
Source: PubMed Central journal article supplement (PMC6659368)
Supplement: dyz070_supplementary_data.pdf [file dyz070_supplementary_data.pdf]

Elucidation of causal direction between asthma and obesity:  
a bi-directional Mendelian randomization study

**Supporting Information**

| CHR | SNP        | Genes                          | Allele | EAF   | $\beta$ (95% CI)    | P        |
|-----|------------|--------------------------------|--------|-------|---------------------|----------|
| 1   | rs657452   | AGBL4                          | G/A    | 0.39  | 0.023 (0.017-0.029) | 5.48E-13 |
| 1   | rs3101336  | NEGR1                          | T/C    | 0.61  | 0.033 (0.027-0.039) | 2.66E-26 |
| 1   | rs12566985 | FPGT-TNNI3K                    | A/G    | 0.45  | 0.024 (0.018-0.030) | 3.28E-15 |
| 1   | rs12401738 | FUBP1,USP33                    | G/A    | 0.35  | 0.021 (0.015-0.027) | 1.15E-10 |
| 1   | rs11165643 | PTBP2                          | C/T    | 0.58  | 0.022 (0.016-0.028) | 2.07E-12 |
| 1   | rs17024393 | GNAT2,AMPD2                    | T/C    | 0.04  | 0.066 (0.048-0.084) | 7.03E-14 |
| 1   | rs543874   | SEC16B                         | A/G    | 0.19  | 0.048 (0.040-0.056) | 2.62E-35 |
| 1   | rs2820292  | NAV1                           | A/C    | 0.56  | 0.020 (0.014-0.026) | 1.83E-10 |
| 2   | rs13021737 | TMEM18                         | A/G    | 0.83  | 0.060 (0.052-0.068) | 1.11E-50 |
| 2   | rs10182181 | ADCY3,POMC,<br>NCOA1           | A/G    | 0.46  | 0.031 (0.025-0.037) | 8.78E-24 |
| 2   | rs11126666 | KCNK3                          | G/A    | 0.28  | 0.021 (0.015-0.027) | 1.33E-09 |
| 2   | rs1016287  | LINC01122                      | C/T    | 0.29  | 0.023 (0.017-0.029) | 2.25E-11 |
| 2   | rs11688816 | EHBP1                          | A/G    | 0.53  | 0.017 (0.011-0.023) | 1.89E-08 |
| 2   | rs2121279  | LRP1B                          | C/T    | 0.15  | 0.025 (0.017-0.033) | 2.31E-08 |
| 2   | rs1528435  | UBE2E3                         | C/T    | 0.63  | 0.018 (0.012-0.024) | 1.20E-08 |
| 2   | rs7599312  | ERBB4                          | A/G    | 0.72  | 0.022 (0.016-0.028) | 1.17E-10 |
| 3   | rs6804842  | RARB                           | A/G    | 0.58  | 0.019 (0.013-0.025) | 2.48E-09 |
| 3   | rs2365389  | FHIT                           | T/C    | 0.58  | 0.020 (0.014-0.026) | 1.63E-10 |
| 3   | rs3849570  | GBE1                           | C/A    | 0.36  | 0.019 (0.013-0.025) | 2.60E-08 |
| 3   | rs13078960 | CADM2                          | T/G    | 0.20  | 0.030 (0.022-0.038) | 1.74E-14 |
| 3   | rs16851483 | RASA2                          | G/T    | 0.07  | 0.048 (0.032-0.064) | 3.55E-10 |
| 3   | rs1516725  | ETV5                           | T/C    | 0.87  | 0.045 (0.035-0.055) | 1.89E-22 |
| 4   | rs10938397 | GNPDA2,GABRG1                  | A/G    | 0.43  | 0.040 (0.034-0.046) | 3.21E-38 |
| 4   | rs17001654 | NUP54,SCARB2                   | C/G    | 0.15  | 0.031 (0.021-0.041) | 7.76E-09 |
| 4   | rs13107325 | SLC39A8                        | C/T    | 0.07  | 0.048 (0.034-0.062) | 1.83E-12 |
| 4   | rs11727676 | HHIP                           | C/T    | 0.91  | 0.036 (0.024-0.048) | 2.55E-08 |
| 5   | rs2112347  | POC5,HMGCR,<br>COL4A3BP        | G/T    | 0.63  | 0.026 (0.020-0.032) | 6.19E-17 |
| 6   | rs205262   | C6orf106,SNRPC                 | A/G    | 0.27  | 0.022 (0.014-0.030) | 1.75E-10 |
| 6   | rs2033529  | TDRG1,LRFN2                    | A/G    | 0.29  | 0.019 (0.013-0.025) | 1.39E-08 |
| 6   | rs2207139  | TFAP2B                         | A/G    | 0.18  | 0.045 (0.037-0.053) | 4.13E-29 |
| 6   | rs9400239  | FOXO3,HSS00296402              | T/C    | 0.69  | 0.019 (0.013-0.025) | 1.61E-08 |
| 6   | rs13191362 | PARK2                          | G/A    | 0.88  | 0.028 (0.018-0.038) | 7.34E-09 |
| 7   | rs1167827  | HIP1,PMS2L3,<br>PMS2P5,WBSCR16 | A/G    | 0.553 | 0.020 (0.014-0.026) | 6.33E-10 |
| 7   | rs2245368  | PMS2L11                        | T/C    | 0.18  | 0.032 (0.020-0.044) | 3.19E-08 |
| 8   | rs17405819 | HNF4G                          | C/T    | 0.70  | 0.022 (0.016-0.028) | 2.07E-11 |
| 8   | rs2033732  | RALYL                          | T/C    | 0.75  | 0.019 (0.011-0.027) | 4.89E-08 |
| 9   | rs4740619  | C9orf93                        | C/T    | 0.54  | 0.018 (0.012-0.024) | 4.56E-09 |

| CHR | SNP        | Genes                                          | Allele | EAF  | $\beta$ (95% CI)    | P         |
|-----|------------|------------------------------------------------|--------|------|---------------------|-----------|
| 9   | rs10968576 | LINGO2                                         | A/G    | 0.32 | 0.025 (0.019-0.031) | 6.61E-14  |
| 9   | rs6477694  | EPB41L4B,C9orf4                                | T/C    | 0.37 | 0.017 (0.011-0.023) | 2.67E-08  |
| 9   | rs1928295  | TLR4                                           | C/T    | 0.55 | 0.019 (0.013-0.025) | 7.91E-10  |
| 9   | rs10733682 | LMX1B                                          | G/A    | 0.48 | 0.017 (0.011-0.023) | 1.83E-08  |
| 10  | rs7899106  | GRID1                                          | A/G    | 0.05 | 0.040 (0.026-0.054) | 2.96E-08  |
| 10  | rs17094222 | HIF1AN                                         | T/C    | 0.21 | 0.025 (0.017-0.033) | 5.94E-11  |
| 10  | rs11191560 | NT5C2,CYP17A1,<br>SFXN2                        | T/C    | 0.09 | 0.031 (0.021-0.041) | 8.45E-09  |
| 10  | rs7903146  | TCF7L2                                         | T/C    | 0.71 | 0.023 (0.017-0.029) | 1.11E-11  |
| 11  | rs4256980  | TRIM66,TUB                                     | C/G    | 0.65 | 0.021 (0.015-0.027) | 2.90E-11  |
| 11  | rs11030104 | BDNF                                           | G/A    | 0.79 | 0.041 (0.033-0.049) | 5.56E-28  |
| 11  | rs2176598  | HSD17B12                                       | C/T    | 0.25 | 0.020 (0.012-0.028) | 2.97E-08  |
| 11  | rs3817334  | MTCH2,C1QTNF4,<br>SPI1,CELF1                   | C/T    | 0.41 | 0.026 (0.02-0.032)  | 5.15E-17  |
| 11  | rs12286929 | CADM1                                          | A/G    | 0.52 | 0.022 (0.016-0.028) | 1.31E-12  |
| 12  | rs7138803  | BCDIN3D,FAIM2                                  | G/A    | 0.38 | 0.032 (0.026-0.038) | 8.15E-24  |
| 12  | rs11057405 | CLIP1                                          | A/G    | 0.90 | 0.031 (0.019-0.043) | 2.02E-08  |
| 13  | rs12429545 | OLFM4                                          | G/A    | 0.13 | 0.033 (0.023-0.043) | 1.09E-12  |
| 13  | rs9581854* | MTIF3,GTF3A                                    | C/T    | 0.20 | 0.030 (0.020-0.040) | 2.29E-10  |
| 14  | rs10132280 | STXBP6                                         | A/C    | 0.68 | 0.023 (0.017-0.029) | 1.14E-11  |
| 14  | rs12885454 | PRKD1                                          | A/C    | 0.64 | 0.021 (0.015-0.027) | 1.94E-10  |
| 14  | rs11847697 | PRKD1                                          | C/T    | 0.04 | 0.049 (0.033-0.065) | 3.99E-09  |
| 14  | rs7141420  | NRXN3                                          | C/T    | 0.53 | 0.024 (0.018-0.030) | 1.23E-14  |
| 15  | rs3736485  | SCG3,DMXL2                                     | G/A    | 0.45 | 0.018 (0.012-0.024) | 7.41E-09  |
| 15  | rs16951275 | MAP2K5,LBXCOR1                                 | C/T    | 0.78 | 0.031 (0.023-0.039) | 1.91E-17  |
| 16  | rs758747   | NLRC3                                          | C/T    | 0.27 | 0.023 (0.015-0.031) | 7.47E-10  |
| 16  | rs12446632 | GPRC5B,IQCK                                    | A/G    | 0.87 | 0.040 (0.030-0.050) | 1.48E-18  |
| 16  | rs2650492  | SBK1,APOBR                                     | G/A    | 0.30 | 0.021 (0.013-0.029) | 1.92E-09  |
| 16  | rs9925964  | KAT8,ZNF646,<br>VKORC1,ZNF668,<br>STX1B,FBXL19 | G/A    | 0.62 | 0.019 (0.013-0.025) | 8.11E-10  |
| 16  | rs1558902  | FTO                                            | T/A    | 0.42 | 0.082 (0.076-0.088) | 7.51E-153 |
| 17  | rs1000940  | RABEP1                                         | A/G    | 0.32 | 0.019 (0.013-0.025) | 1.28E-08  |
| 17  | rs12940622 | RPTOR                                          | A/G    | 0.58 | 0.018 (0.012-0.024) | 2.49E-09  |
| 18  | rs1808579  | NPC1,C18orf8                                   | T/C    | 0.53 | 0.017 (0.011-0.023) | 4.17E-08  |
| 18  | rs7243357  | GRP                                            | G/T    | 0.81 | 0.022 (0.014-0.030) | 3.86E-08  |
| 18  | rs6567160  | MC4R                                           | T/C    | 0.24 | 0.056 (0.048-0.064) | 3.93E-53  |
| 19  | rs17724992 | GDF15,PGPEP1                                   | G/A    | 0.75 | 0.019 (0.011-0.027) | 3.42E-08  |
| 19  | rs29941    | KCTD15                                         | A/G    | 0.67 | 0.018 (0.012-0.024) | 2.41E-08  |
| 19  | rs2075650  | TOMM40,APOE,<br>APOC1                          | G/A    | 0.85 | 0.026 (0.016-0.036) | 1.25E-08  |
| 19  | rs2287019  | QPCTL,GIPR                                     | T/C    | 0.80 | 0.036 (0.028-0.044) | 4.59E-18  |
| 19  | rs3810291  | ZC3H4                                          | G/A    | 0.67 | 0.028 (0.020-0.036) | 4.81E-15  |

**Table S1.** List of BMI-associated SNPs in European-ancestry. Genes reported are based on biological relevance to obesity, copy number variation, DEPICT analyses, GRAIL results, BMI-association variant in strong LD ( $r^2 \geq 0.7$ ) with a missense variant, nearest to index SNP, association and eQTL data converge to affect gene expression. Allele (reference/effect), effect allele frequency (EAF), marginal effect ( $\beta$ ), 95% confidence intervals (95% CI), and significance of marginal effect ( $P$ ) based on the meta analysis of GWAS data from the European data set [?]. SNP rs9581854\* replaces rs12016871 as the latter was deprecated and they are in perfect LD.

| CHR | SNP        | Genes                  | Allele | EAF  | OR (95% CI)      | P        |
|-----|------------|------------------------|--------|------|------------------|----------|
| 5   | rs10455025 | SLC25A46,TSLP          | A/C    | 0.34 | 1.15 (1.12-1.18) | 2.00E-25 |
| 6   | rs2325291  | BACH2,GJA10,<br>MAP3K7 | G/A    | 0.33 | 0.91 (0.89-0.93) | 8.60E-13 |
| 8   | rs12543811 | TPD52,ZBTB10           | G/A    | 0.66 | 0.93 (0.91-0.95) | 3.50E-08 |
| 9   | rs992969   | RANBP6,IL33            | A/G    | 0.75 | 0.85 (0.82-0.88) | 1.10E-17 |
| 10  | rs2589561  | GATA3,CELF2            | A/G    | 0.82 | 0.90 (0.87-0.94) | 1.40E-08 |
| 15  | rs11071558 | RORA,NARG2,<br>VPS13C  | A/G    | 0.14 | 0.89 (0.85-0.92) | 1.90E-10 |
| 16  | rs17806299 | CLEC16A,DEXI,<br>SOCS1 | G/A    | 0.20 | 0.90 (0.88-0.93) | 2.10E-10 |
| 17  | rs17637472 | ZNF652,PHB             | G/A    | 0.39 | 1.08 (1.05-1.11) | 3.30E-09 |

**Table S2.** List of SNPs associated with asthma among European-ancestry population in TAGC [?]. Genes reported are based on where the lead SNP lies that is coding for proteins, Allele (reference/effect allele), effect allele frequency (EAF), odds-ratios (ORs), 95% confidence intervals (95% CI), and significance ( $P$ ) based on the meta analysis of GWAS data using a random effects model.

| Causal link              | Method        | Estimate | 95% CI           | $P$   |
|--------------------------|---------------|----------|------------------|-------|
| BMI $\rightarrow$ asthma | fixed-effect  | 1.211    | [ 1.176, 1.247]  | 6e-38 |
|                          | random-effect | 1.214    | [ 1.169, 1.261]  | 2e-23 |
|                          | MR-Egger      | 1.187    | [ 1.050, 1.342]  | 0.006 |
|                          | penalized     | 1.191    | [ 1.137, 1.248]  | 2e-13 |
|                          | MR-PRESSO     | 1.218    | [ 1.175, 1.263]  | 3e-25 |
| asthma $\rightarrow$ BMI | fixed-effect  | -0.011   | [-0.017, -0.005] | 3e-04 |
|                          | random-effect | -0.013   | [-0.024, -0.003] | 0.018 |
|                          | MR-Egger      | -0.013   | [-0.041, 0.015]  | 0.369 |
|                          | penalized     | -0.011   | [-0.021, -0.001] | 0.034 |
|                          | MR-PRESSO     | -0.013   | [-0.022, -0.004] | 0.004 |

**Table S3.** Causal estimates of body mass index  $z$ -score on asthma and the reverse direction reported by fixed effect and random effect meta analyses, MR-Egger, penalized weighted median, and MR-PRESSO via one-sample MR.

| Causal link | Method        | Estimate | 95% CI        | P        |
|-------------|---------------|----------|---------------|----------|
| BMI → T2D   | fixed-effect  | 2.80     | [2.53, 3.09]  | 5.80e-91 |
|             | random-effect | 2.50     | [1.39, 4.51]  | 2.24e-03 |
|             | MR-Egger      | 3.66     | [1.55, 8.59]  | 2.97e-03 |
|             | (intercept)   | 0.99     | [0.97, 1.01]  | 4.88e-01 |
|             | MR-PRESSO     | 3.30     | [2.89, 3.77]  | 1.24e-27 |
| BMI → CVD   | fixed-effect  | 1.53     | [1.464, 1.60] | 8.72e-81 |
|             | random-effect | 1.60     | [1.270, 2.03] | 7.38e-05 |
|             | MR-Egger      | 1.28     | [0.934, 1.75] | 1.25e-01 |
|             | (intercept)   | 1.01     | [0.997, 1.01] | 2.00e-01 |
|             | MR-PRESSO     | 1.67     | [1.556, 1.79] | 5.18e-21 |

**Table S4.** Causal estimates of body mass index  $z$ -score on type-2 diabetes and cardiovascular diseases reported by fixed effect and random effect meta analyses, MR-Egger, penalized weighted median, and MR-PRESSO via GIANT-UKB two-sample MR.

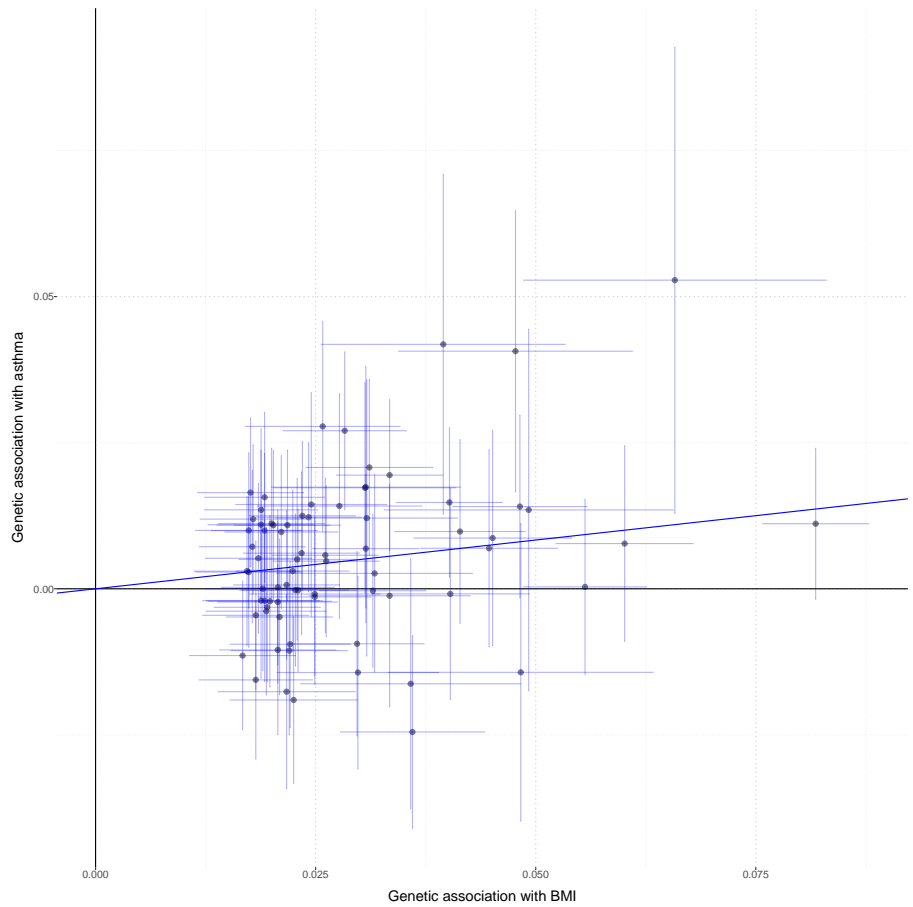

**Figure S1.** Genetic association with BMI in GIANT versus genetic association with asthma in UKB for 75 BMI-SNPs. Each dot represents a SNP, the horizontal bar indicates the 95% CI for its association with BMI, while the vertical bar does that of asthma.

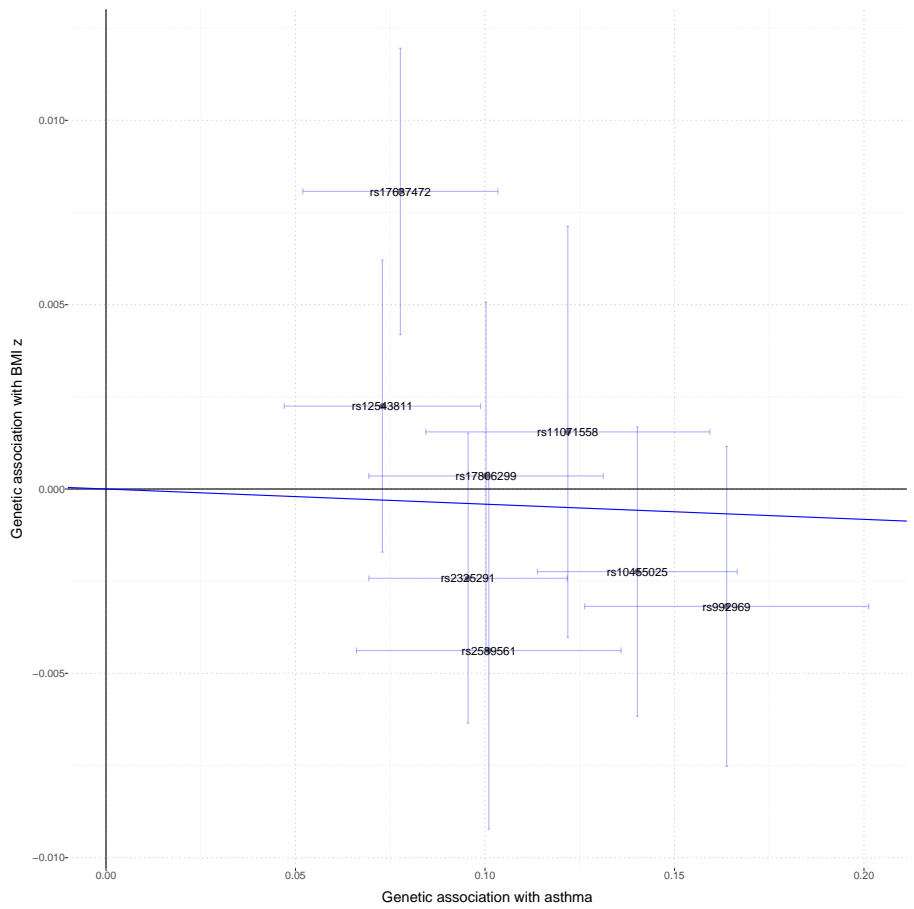

**Figure S2.** Genetic association with asthma in TAGC versus genetic association with BMI  $z$ -scores in UKB. Each dot represents a SNP, the horizontal bar indicates the 95% CI for its association with asthma, while the vertical bar does that of BMI  $z$ -score.

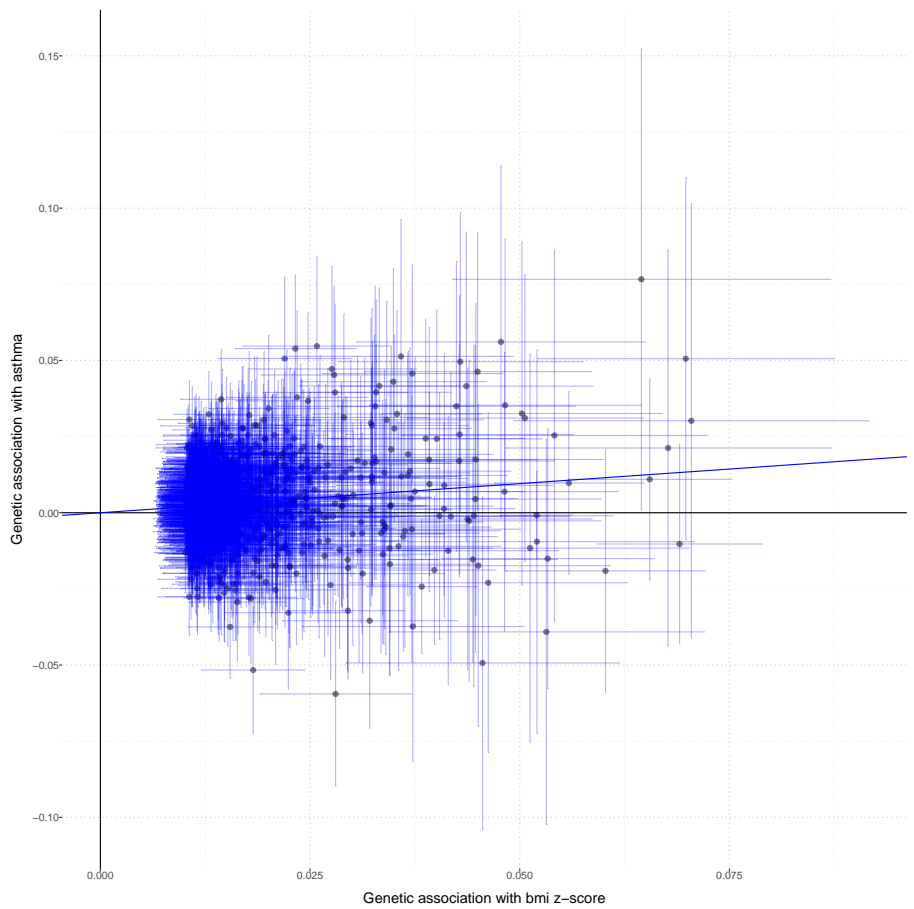

**Figure S3.** Genetic association with body mass index versus genetic association with asthma in UKB, where the slope indicate fixed effect meta analysis estimate.

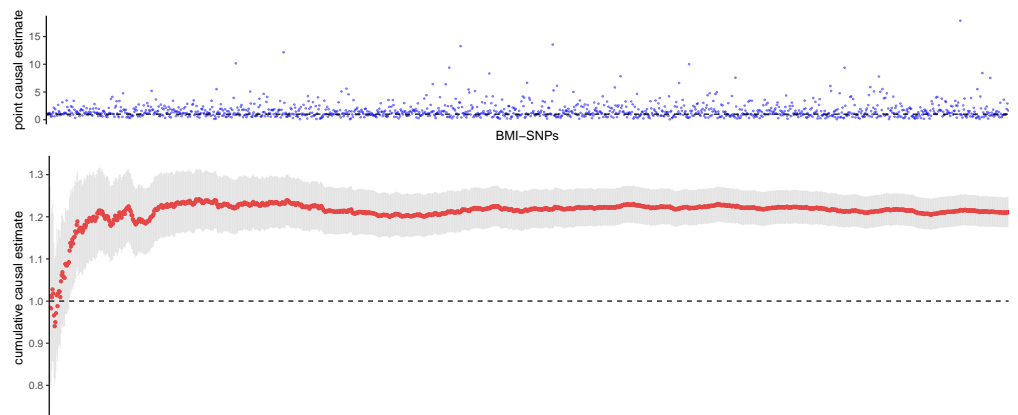

**Figure S4.** Cumulative effect estimates of BMI on asthma risk in UKB for a total of 1348 independent SNPs are displayed in the bottom panel, where red dots are the point estimates and gray vertical bars suggest the corresponding 95% CIs. Instrumental SNP was added sequentially in the order based on the  $p$ -value of its association with BMI z-score. Point estimate of the added SNP is shown on the top panel and colored in blue.

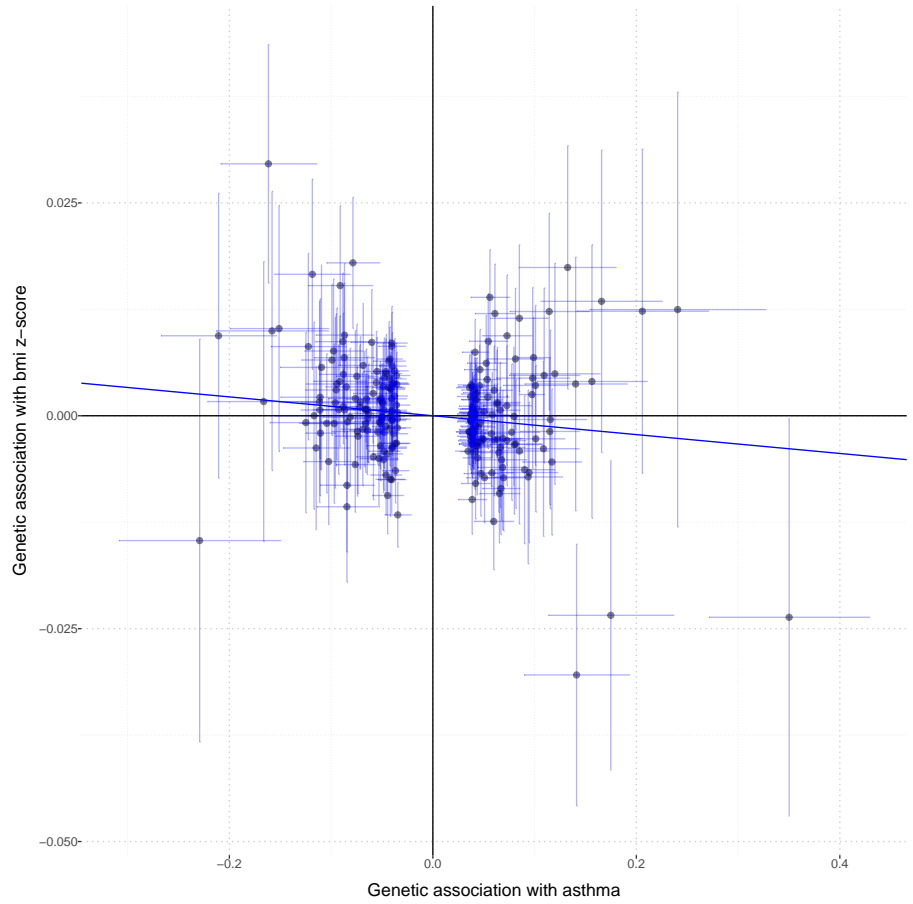

**Figure S5.** Genetic association with asthma versus genetic association with body mass index in UKB, where the slope indicates fixed effect meta analysis estimate.

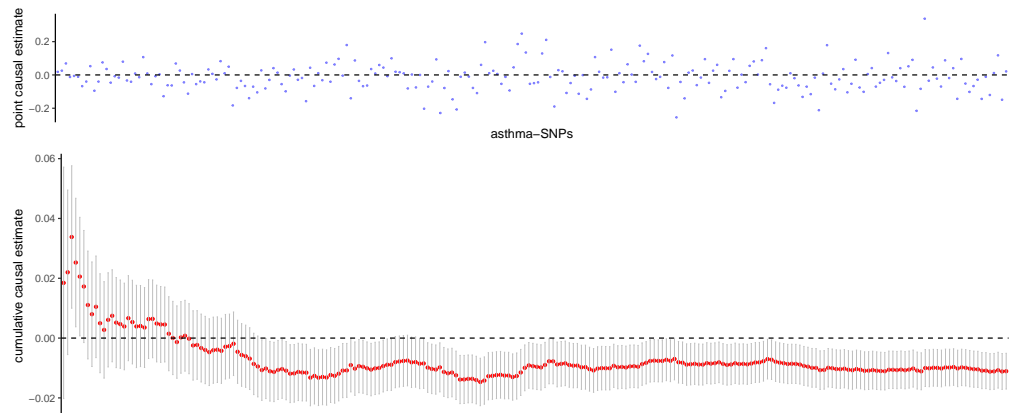

**Figure S6.** Cumulative effect estimates of asthma on BMI in UKB for a total of 234 independent SNPs are displayed in the bottom panel, where red dots are the point estimates and gray vertical bars suggest the corresponding 95% CIs. Instrumental SNP was added sequentially in the order based on the  $p$ -value of its association with asthma. Point estimate of the added SNP is shown on the top panel and colored in blue.
